# Supplementary material for: Missed opportunities for HIV testing among patients newly presenting for HIV care at a Swiss university hospital: a retrospective analysis
Source: PubMed Central journal article supplement — BMJ Open. 2018 Jun 12;8(6):e019806. doi: 10.1136/bmjopen-2017-019806 (PMC6009466; doi:10.1136/bmjopen-2017-019806), 2018-06-12
Supplement: bmjopen-2017-019806supp001.pdf [file bmjopen-2017-019806supp001.pdf]

**Table S1.** Recent studies examining missed opportunities (MOs) in persons newly-diagnosed with HIV, listed in alphabetical order of the country of study.

| Country          | Study focus                                                                                                              | Setting                    | Study period | Subjects analysed                                                               | Subject number              | Data source                                                  | MO definition (time period examined)                                                                                                    |
|------------------|--------------------------------------------------------------------------------------------------------------------------|----------------------------|--------------|---------------------------------------------------------------------------------|-----------------------------|--------------------------------------------------------------|-----------------------------------------------------------------------------------------------------------------------------------------|
| Germany (12)     | Characteristics of LPs & % of MOs                                                                                        | Hospital ID service        | 2009-2013    | Newly-diagnosed adults presenting late (CD4 count < 350 cells/mm <sup>3</sup> ) | 270                         | Medical records                                              | Presentation with documented HIV IC but testing offered (not stated)                                                                    |
| Israel (16)      | MOs for earlier diagnosis in patients presenting with advanced HIV disease (AHD, CD4 count < 200 cells/mm <sup>3</sup> ) | Hospital                   | 2010-2015    | Patients with AHD                                                               | 57 of 356 new HIV diagnoses | Medical insurer electronic data files and patient interviews | Patient presenting 2 out of:<br>-IC<br>-belonging risk group<br>-US(34) or UK(36) indications testing (up to 5 years pre-HIV diagnosis) |
| Netherlands (13) | HIV testing offered to high risk groups during STI-related GP consultations                                              | Sentinel general practices | 2008-2013    | STI-related consults with high-risk groups                                      | 3209                        | GP report database & national HIV cohort data                | HIV testing indicated in high-risk groups but not offered (study period)                                                                |
| Scotland (14)    | Factors associated with late diagnosis                                                                                   | Hospital ID & GUM service  | 2009-2014    | Newly-diagnosed adults                                                          | 124                         | National surveillance data & case notes                      | Failure to diagnose HIV within 3 months of first ID or ADI presentation (up to 5 years pre-HIV diagnosis)                               |
| Spain (15)       | Frequency of late diagnosis and associated risk factors                                                                  | Hospital ID service        | 2007-2014    | Newly-diagnosed adults                                                          | 354                         | Medical records                                              | Presentation with IC but testing offered or testing performed months after symptom onset (up to 5 years pre-HIV diagnosis)              |

Abbreviations: LP, late presenter; ID, infectious diseases; IC, indicator condition; STI, sexually transmitted infection; GP, general practitioner; GUM, genitourinary medicine; ADI, AIDS defining illness; AHD, advanced HIV disease; US, United States; UK, United Kingdom.

**Table S2.** Categories of prior missed opportunities (MOs) and site of eventual diagnostic test among the 94 patients newly presenting to HIV care between 2010 and 2015 in Lausanne, Switzerland and who had presented at least one MO prior to diagnosis.

| <b>MO type</b> \ <b>Site of diagnostic test</b> | All sites | Primary care physician | Anonymous testing | LUH OP | LUH IP | ED | Gyn / Ob |
|-------------------------------------------------|-----------|------------------------|-------------------|--------|--------|----|----------|
| HIV indicator condition                         | 32        | 5                      | 5                 | 9      | 4      | 0  | 2        |
| Epidemiological risk                            | 84        | 22                     | 10                | 27     | 6      | 0  | 4        |
| Acute HIV                                       | 11        | 2                      | 2                 | 2      | 1      | 0  | 0        |
| AIDS-defining event                             | 1         | 0                      | 0                 | 0      | 0      | 0  | 0        |
| Pregnancy                                       | 7         | 2                      | 0                 | 2      | 1      | 0  | 2        |
| Pre-immunosuppressive treatment                 | 1         | 1                      | 0                 | 0      | 0      | 0  | 0        |
| Total                                           | 136       | 32                     | 17                | 40     | 12     | 0  | 8        |

Abbreviations: MO, missed opportunity; LUH, Lausanne University Hospital; OP, outpatient; IP, inpatient

**Table S3.** Reasons for HIV testing in patients with acute infection newly presenting to HIV care between 2010 and 2015 in Lausanne, Switzerland:

| <b>Reasons for doing HIV test</b> | <b>Number of patients with acute infection (%)</b> |
|-----------------------------------|----------------------------------------------------|
| Patient initiated                 | 1 (3.33 %)                                         |
| Suspicion of acute infection      | 24 (80%)                                           |
| AIDS defining illness             | 1 (3,33 %)                                         |
| HIV indicator condition           | 3 (10%)                                            |
| Epidemiological risk              | 1 (3,33%)                                          |
